# Supplementary material for: Microreactor Based on Trimetallic Nano-Oxides Obtained by In Situ Growth from German Silver
Source: MDPI journal article supplement (doi:10.3390/catal13060932), 2023-05-25
Supplement: s1 [file s1]

## Supplementary information file

**Trimetallic-based microreactor with nano-oxides film obtained by one-pot in situ growth from German silver**

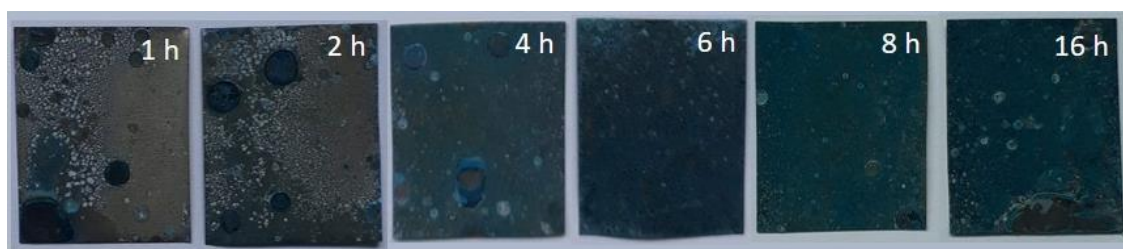

**Figure S1.** Photographs of samples obtained at 80 °C after different synthesis time.

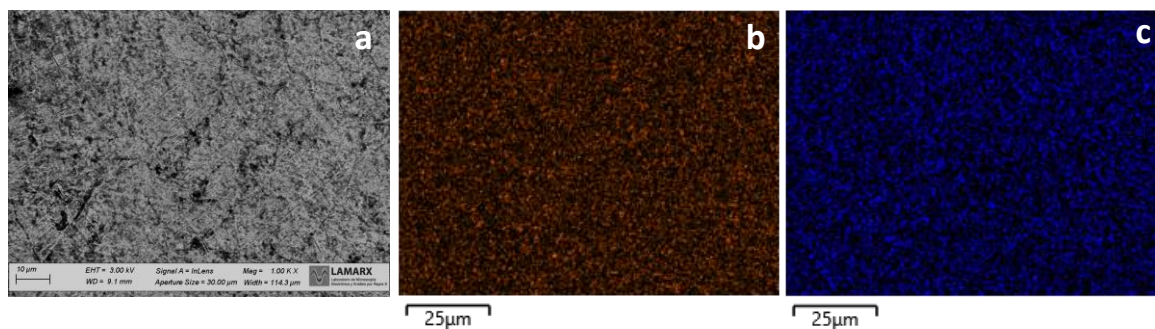

**Figure S2.** SEM image and elemental mappings of bare German silver substrate: a) SEM view of a region analyzed by EDS (magnification 1000 X); b) elemental map of Cu; c) elemental map of Zn.

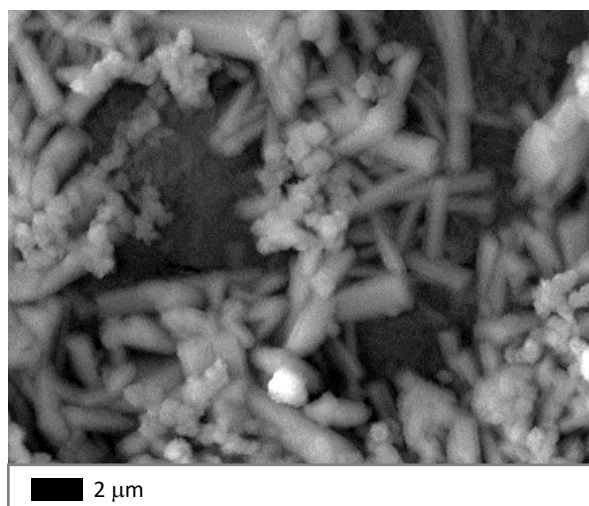

**Figure S3.** SEM image of the CuZnNi(2)80 sample.

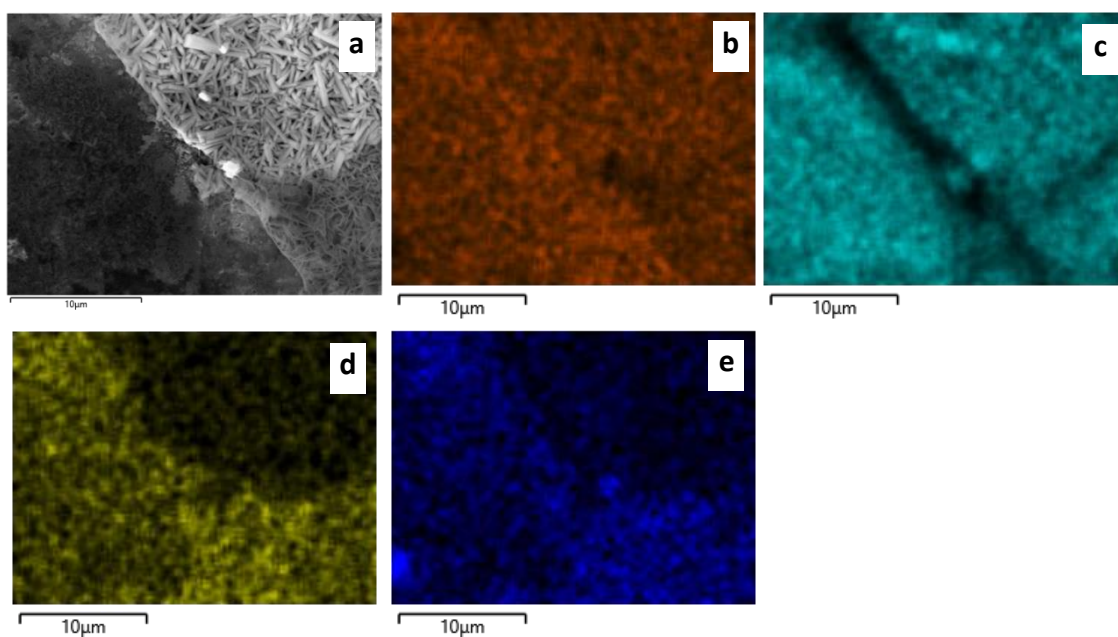

**Figure S4.** SEM image and elemental mapping of the CuZnNi(2)80 sample in another sector: a) SEM view of the region analyzed by EDS (magnification 4000 X); b) elemental map of Cu; c) elemental map of O; d) elemental map of Ni; e) elemental map of Zn.

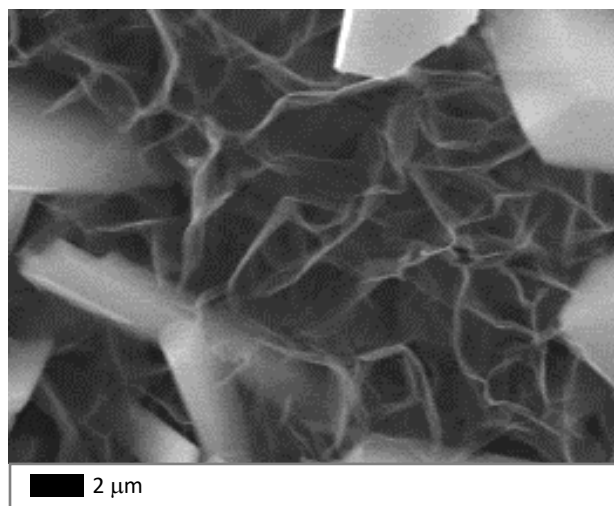

**Figure S5.** SEM of the CuZnNi(6)80 sample.

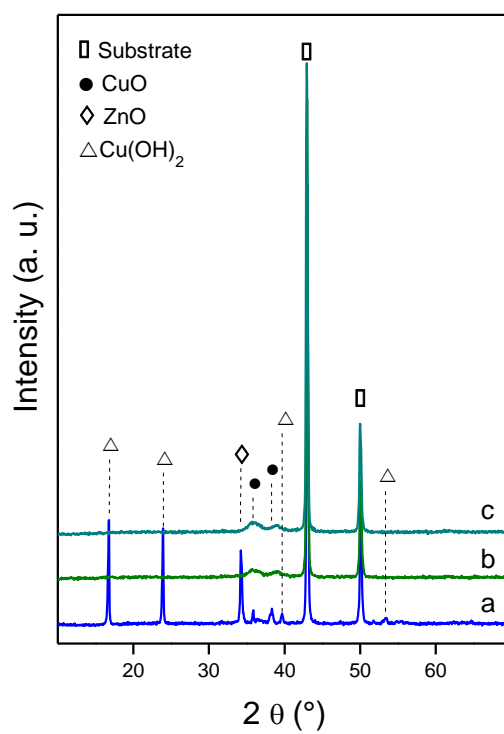

**Figure S6.** XRD patterns of the CuZnNi(1)80 sample: a) fresh; b) after pretreatment in He at 200 °C; c) after successive catalytic runs.
