# Supplementary material for: Microreactor Based on Trimetallic Nano-Oxides Obtained by In Situ Growth from German Silver
Source: MDPI journal article supplement (doi:10.3390/catal13060932), 2023-05-25
Supplement: s1 [file s1]

Archive with 1 entries (1 files):
- catalysts-2398988-supplementary.pdf
